# Supplementary material for: Effectiveness of a Technology-Based Supportive Educational Parenting Program on Parental Outcomes (Part 1): Randomized Controlled Trial
Source: PubMed Central journal article supplement (PMC6391716; doi:10.2196/10816), 2019-02-13
Supplement: jmir_v21i2e10816_app2.pdf [file jmir_v21i2e10816_app2.pdf]

**Multimedia Appendix 2.** Complete cases analysis for couple population (mothers and fathers):  
Estimated differences between the intervention and control groups for changes in standardized  
parental outcomes at postpartum time-points from the baseline

| Standardized outcomes    | Immediately postpartum                   |                                        | 1 month postpartum                       |                                        | 3 months postpartum                      |                                        |
|--------------------------|------------------------------------------|----------------------------------------|------------------------------------------|----------------------------------------|------------------------------------------|----------------------------------------|
|                          | Unadjusted<br>Difference<br>(95% CI) [P] | Adjusted<br>Difference<br>(95% CI) [P] | Unadjusted<br>Difference<br>(95% CI) [P] | Adjusted<br>Difference<br>(95% CI) [P] | Unadjusted<br>Difference<br>(95% CI) [P] | Adjusted<br>Difference<br>(95% CI) [P] |
| Parental self-efficacy   | -0.11<br>(-0.47, 0.26)<br>[0.561]        | -0.30<br>(-0.91, 0.30)<br>[0.168]      | 2.23<br>(1.88, 2.57)<br>[<0.001]         | 2.26<br>(1.97, 2.54)<br>[<0.001]       | 0.43<br>(0.08, 0.77)<br>[0.015]          | 0.43<br>(0.14, 0.71)<br>[0.003]        |
| Parental bonding         | -0.16<br>(-0.50, 0.18)<br>[0.354]        | -0.28<br>(-0.71, 0.14)<br>[0.189]      | -4.12<br>(-4.48, -3.76)<br>[<0.001]      | -4.24<br>(-4.68, -3.81)<br>[<0.001]    | -1.49<br>(-1.91, -1.06)<br>[<0.001]      | -1.77<br>(-2.35, -1.19)<br>[<0.001]    |
| Postnatal depression     | -0.11<br>(-0.42, 0.19)<br>[0.458]        | 0.04<br>(-0.28, 0.36)<br>[0.800]       | -3.71<br>(-1.04, -3.39)<br>[<0.001]      | -3.56<br>(-3.91, -3.21)<br>[<0.001]    | -0.94<br>(-1.28, -0.60)<br>[<0.001]      | -0.98<br>(-1.34, -0.63)<br>[<0.001]    |
| Postnatal anxiety        | 0.19<br>(-0.09, 0.47)<br>[0.180]         | 0.26<br>(-0.05, 0.56)<br>[0.103]       | -3.30<br>(-3.77, -2.84)<br>[<0.001]      | -3.20<br>(-3.34, -2.77)<br>[<0.001]    | -0.76<br>(-1.11, -0.42)<br>[<0.001]      | -0.79<br>(-1.15, -0.43)<br>[<0.001]    |
| Perceived social support | -0.16<br>(-0.48, 0.15)<br>[0.311]        | -0.27<br>(-0.63, 0.08)<br>[0.126]      | 3.09<br>(2.67, 3.50)<br>[<0.001]         | 2.95<br>(2.51, 3.39)<br>[<0.001]       | 0.71<br>(0.13, 1.28)<br>[0.017]          | 0.81<br>(0.19, 1.43)<br>[0.011]        |
| Parenting satisfaction   | 0.01<br>(-0.40, 0.43)<br>[0.944]         | -0.04<br>(-0.45, 0.36)<br>[0.834]      | 3.30<br>(2.81, 3.78)<br>[<0.001]         | 3.25<br>(2.79, 3.71)<br>[<0.001]       | 1.45<br>(0.84, 2.06)<br>[<0.001]         | 1.48<br>(0.87, 2.08)<br>[<0.001]       |

Unadjusted differences were estimated using a linear mixed model adjusted for baseline values. Adjusted differences were estimated using the same model with additions of covariates ethnicity, maternal/paternal leave, confinement period, infant feeding mode, age, length of marriage, household income, employment status, and education. See the Methods section for outcome definitions. CI = Confidence interval.
