# Supplementary material for: Effectiveness of a Technology-Based Supportive Educational Parenting Program on Parental Outcomes (Part 1): Randomized Controlled Trial
Source: PubMed Central journal article supplement (PMC6391716; doi:10.2196/10816), 2019-02-13
Supplement: jmir_v21i2e10816_app3.pdf [file jmir_v21i2e10816_app3.pdf]

**Multimedia Appendix 3.** Multiple imputation analyses for couple population (mothers and fathers): Estimated differences between the intervention and control groups for changes in standardized parental outcomes at postpartum timepoints from the baseline

| Standardized outcomes    | Immediately postpartum                   |                                        | 1 month postpartum                       |                                        | 3 months postpartum                      |                                        |
|--------------------------|------------------------------------------|----------------------------------------|------------------------------------------|----------------------------------------|------------------------------------------|----------------------------------------|
|                          | Unadjusted<br>Difference<br>(95% CI) [P] | Adjusted<br>Difference<br>(95% CI) [P] | Unadjusted<br>Difference<br>(95% CI) [P] | Adjusted<br>Difference<br>(95% CI) [P] | Unadjusted<br>Difference<br>(95% CI) [P] | Adjusted<br>Difference<br>(95% CI) [P] |
| Parental self-efficacy   | -0.42<br>(-0.99, 0.15)<br>[0.150]        | -0.42 (-0.99, 0.15)<br>[0.152]         | 1.99<br>(1.39, 2.59)<br>[<0.001]         | 1.98 (1.38, 2.58)<br>[<0.001]          | 1.99<br>(1.39, 2.59)<br>[<0.001]         | 1.98 (1.38, 2.58)<br>[<0.001]          |
| Parental bonding         | -0.12<br>(-0.46, 0.21)<br>[0.467]        | -0.13<br>(-0.49, 0.23)<br>[0.479]      | -3.50<br>(-3.94, -3.09)<br>[<0.001]      | -3.49<br>(-3.87, -3.12)<br>[<0.001]    | -1.26<br>(-1.73, -0.79)<br>[<0.001]      | -1.25<br>(-1.63, -0.87)<br>[<0.001]    |
| Postnatal depression     | -0.16<br>(-0.56, 0.24)<br>[0.438]        | -0.15<br>(-0.56, 0.26)<br>[0.465]      | -3.64<br>(-4.13, -3.16)<br>[<0.001]      | -3.64<br>(-4.15, -3.13)<br>[<0.001]    | -3.64<br>(-4.13, -3.16)<br>[<0.001]      | -3.64<br>(-4.15, -3.13)<br>[<0.001]    |
| Postnatal anxiety        | 0.03<br>(-0.34, 0.39)<br>[0.881]         | 0.06<br>(-0.57, 0.69)<br>[0.849]       | -3.32<br>(-3.81, -2.82)<br>[<0.001]      | -3.25<br>(-4.34, -2.16)<br>[<0.001]    | -3.32<br>(-3.81, -2.82)<br>[<0.001]      | -3.30<br>(-3.70, -2.91)<br>[<0.001]    |
| Perceived social support | -0.22<br>(-1.18, 0.75)<br>[0.657]        | -0.17<br>(-0.62, 0.29)<br>[0.474]      | 3.05<br>(2.00, 4.10)<br>[<0.001]         | 3.10<br>(2.56, 3.64)<br>[<0.001]       | 3.05<br>(2.00, 4.10)<br>[<0.001]         | 3.10<br>(2.56, 3.64)<br>[<0.001]       |
| Parenting satisfaction   | 0.38<br>(-0.11, 0.86)<br>[0.128]         | 0.377<br>(-0.12, 0.87)<br>[0.134]      | 3.78<br>(3.19, 4.36)<br>[<0.001]         | 3.77<br>(3.18, 4.37)<br>[<0.001]       | 3.77<br>(3.19, 4.6)<br>[<0.001]          | 3.77<br>(3.18, 4.37)<br>[<0.001]       |

Unadjusted differences were estimated using a linear mixed model adjusted for baseline values. Adjusted differences were estimated using the same model with additions of covariates ethnicity, maternal/paternal leave, confinement period, infant feeding mode, age, length of marriage, household income, employment status, and education. See the Methods section for outcome definitions. CI = Confidence interval.
